# Supplementary material
Source: PubMed Central journal article supplement (PMC4854305)
Supplement: NIHMS702531-supplement-1.pdf [file NIHMS702531-supplement-1.pdf]

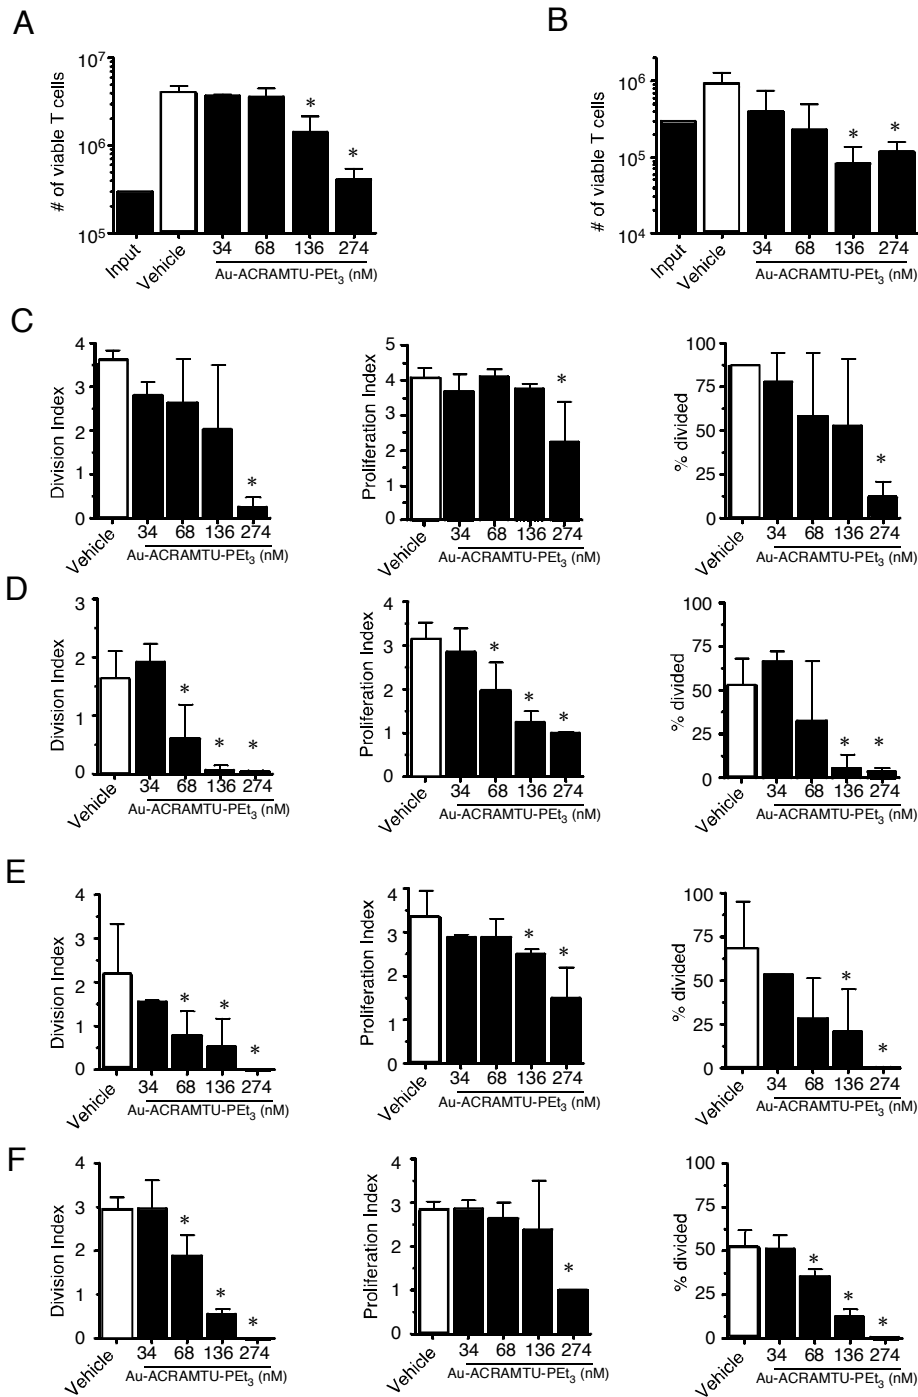

**Figure 1. Incubation with Au-ACRAMTU-PET<sub>3</sub> decreases the division and proliferative indexes and the percentage of naïve murine and human T cells that divide.** Splenocytes were isolated from naïve C57BL/6 mice, and CD8<sup>+</sup> T cells (A) or CD4<sup>+</sup> T cells (B) were purified by magnetic microbeads and the number of viable cells was determined on day 3 anti-CD3/CD28 stimulation in the presence of increasing Au-ACRAMTU-PET<sub>3</sub>. The division index, proliferation index, and % divided were determined for murine CD8<sup>+</sup> (C) and CD4<sup>+</sup> T cells (D). Similar measurements were made for human CD8<sup>+</sup> (E) and CD4<sup>+</sup> (F) T cells on day 5 anti-CD3/CD28 stimulation in the presence of increasing Au-ACRAMTU-PET<sub>3</sub>. Four subjects were used in 4 independent experiments. The mean and SD are plotted. \*, significant difference between vehicle- and Au-ACRAMTU-PET<sub>3</sub>-treated cells,  $p < 0.05$ .

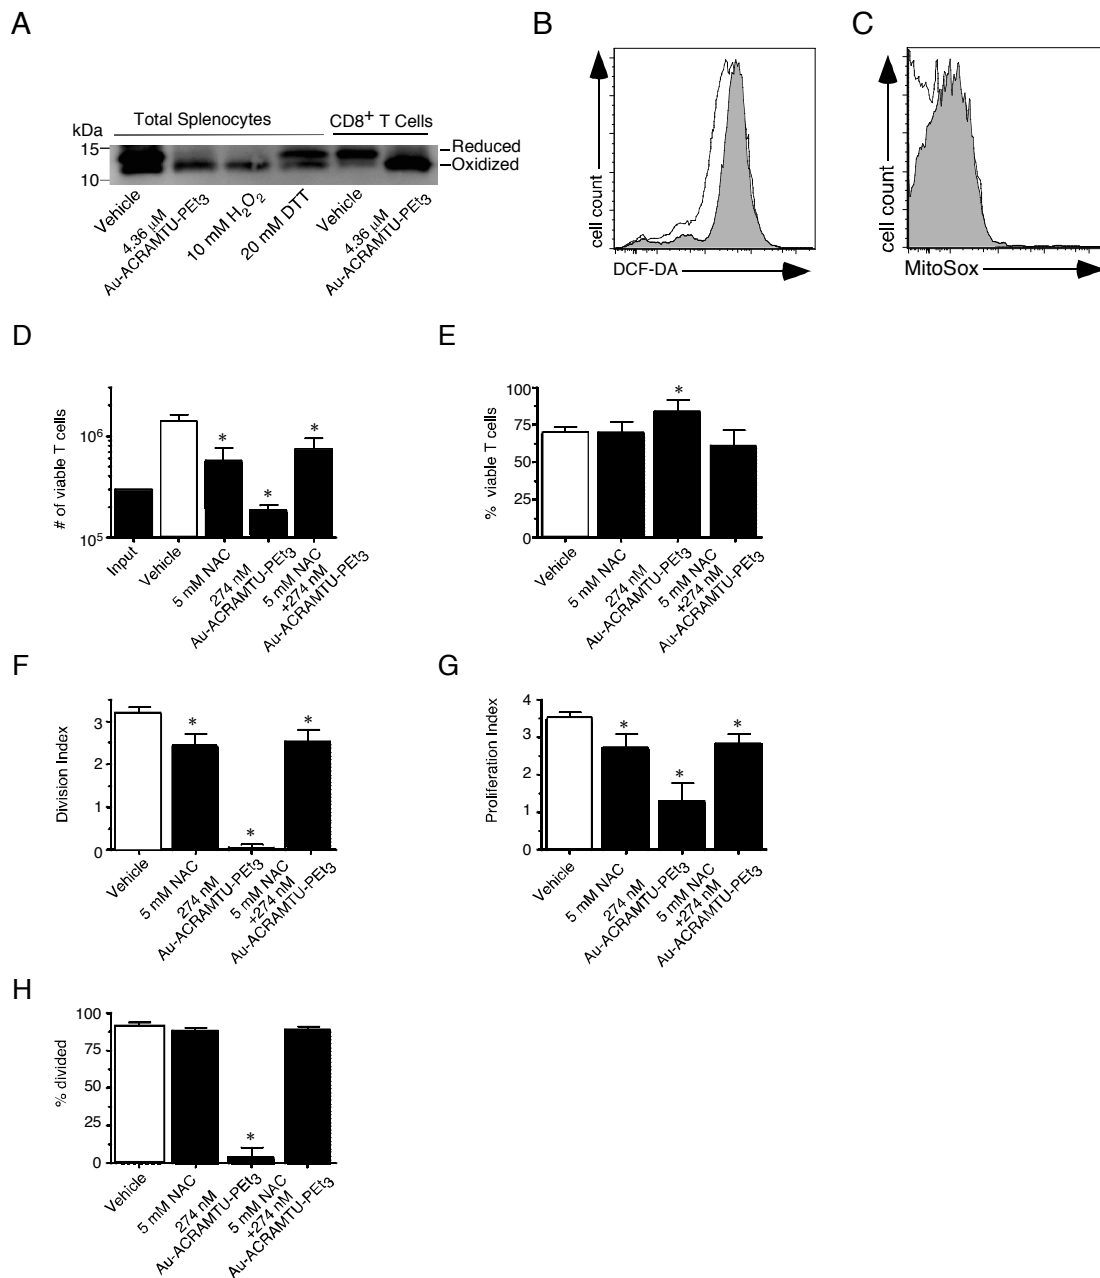

**Figure 2. Au-ACRAMTU-PET<sub>3</sub> modulates the redox status of cells.** (A) Splenocytes and purified CD8<sup>+</sup> T cells ( $5 \times 10^6$ ) from naive C57BL/6 mice were treated for 30 min in 10 mM H<sub>2</sub>O<sub>2</sub> or 20 mM dithiothreitol (DTT) or for 60 min in 4.36 μM Au-ACRAMTU-PET<sub>3</sub> or vehicle. Proteins were then precipitated and alkylated with AMS prior to separation on a 15% polyacrylamide separating gel. This blot is representative of Trx2 oxidation state in the presence of H<sub>2</sub>O<sub>2</sub>, DTT, Au-ACRAMTU-PET<sub>3</sub>, or vehicle in 2 independent experiments. CD8<sup>+</sup> T cells were purified from naive C57BL/6 mice and then were preincubated with vehicle or 274 nM Au-ACRAMTU-PET<sub>3</sub> for 60 minutes. Cells were then incubated with either (B) DCF-DA or (C) MitoSox for 30 minutes, washed and then acquired immediately. The open histogram represents vehicle-treated cells, while filled histograms are from Au-ACRAMTU-PET<sub>3</sub> pretreated cells. Staining is representative of 3 mice in two independent experiments. Magnetic microbead purified CD8<sup>+</sup> T cells were incubated with 0.1% DMF control or 5mM NAC for 60 minutes at 37°C. Afterwards cells were incubated with 0.1% DMF or 274 nM Au-ACRAMTU-PET<sub>3</sub> for 60 minutes. Cells were then placed on αCD3/αCD28 coated plates and the number of viable cells (D), percentage of viable cells (E), division index (F), proliferation index (G), and % divided (H) were determined on day 3. Four mice were analyzed in 3 independent experiments. The mean and standard deviation are plotted. \*, significant difference between vehicle- and Au-ACRAMTU-PET<sub>3</sub>-treated cells,  $p < 0.05$ , student's t test..

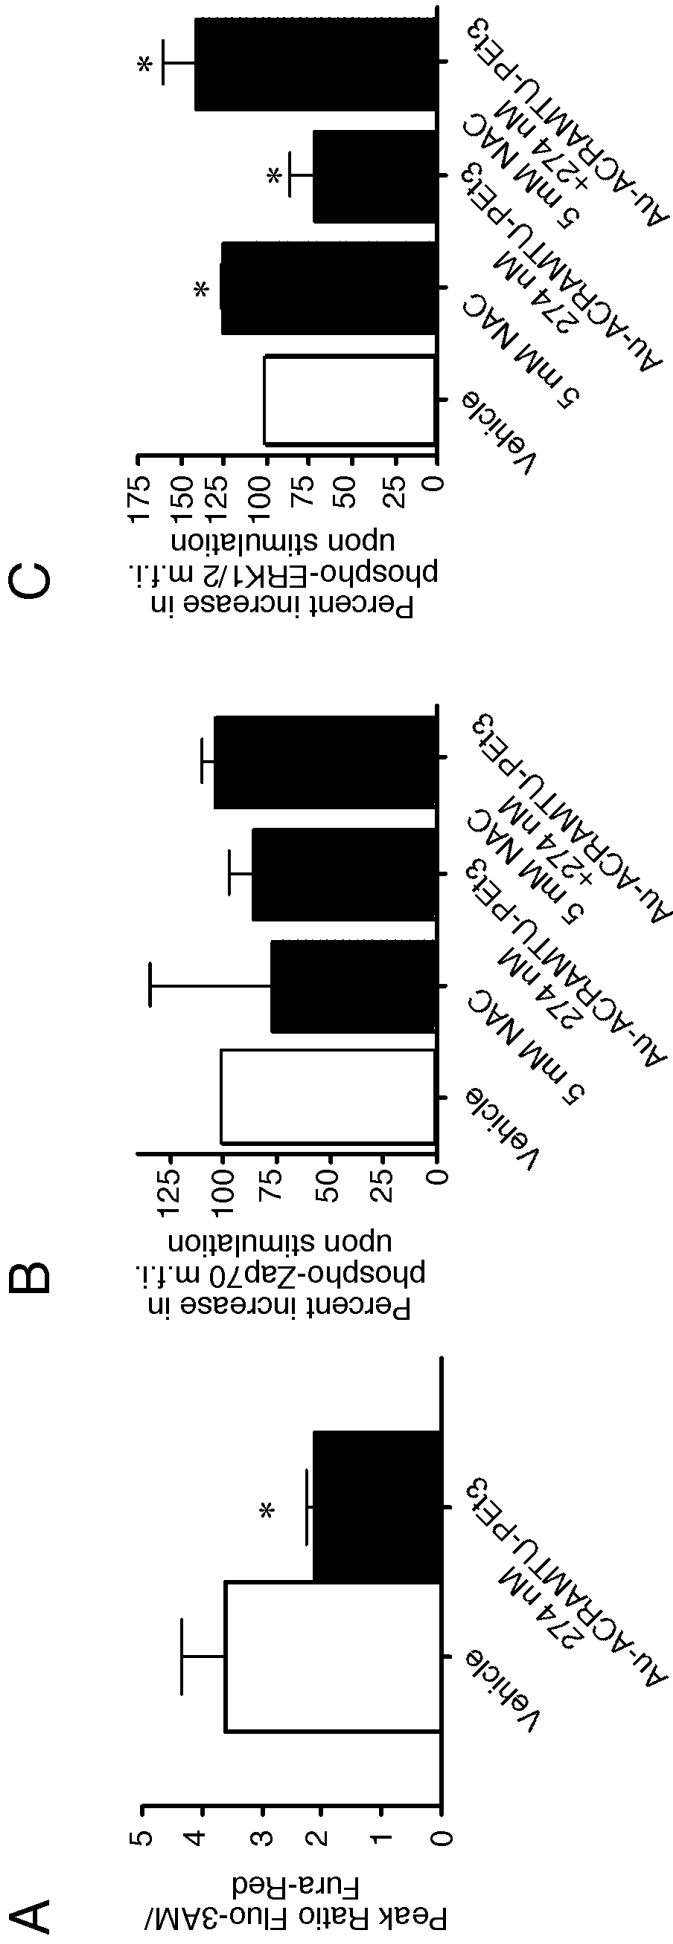

**Figure 3. Quantification of T cell signal transduction.** (A) Magnetic microbead purified CD8<sup>+</sup> T cells were incubated with 0.1% DMF or 274 nM Au-ACRAMTU-PEt<sub>3</sub> for 60 minutes. Cells were then coated with  $\alpha$ CD3/ $\alpha$ CD8 antibodies followed by streptavidin crosslinking. The peak ratio of Fluo-3/Fura-Red was determined for 3 mice in 2 independent experiments. The average and standard deviation are plotted. Alternatively, magnetic microbead purified CD8<sup>+</sup> T cells were incubated with 0.1% DMF control or 5mM NAC for 60 minutes at 37°C. Afterwards cells were incubated with 0.1% DMF or 274 nM Au-ACRAMTU-PEt<sub>3</sub> for 60 minutes. Cells were then coated with  $\alpha$ CD3/ $\alpha$ CD8 antibodies followed by streptavidin crosslinking. Intracellular staining for (B) phospho-Zap-70 or (C) phospho-ERK1/2 was performed. The percent increase in m.f.i. relative to the vehicle-treated sample was calculated. The mean and standard deviation are plotted. \*, significant difference between vehicle- and Au-ACRAMTU-PEt<sub>3</sub>-treated cells, p<0.05, student's t test.

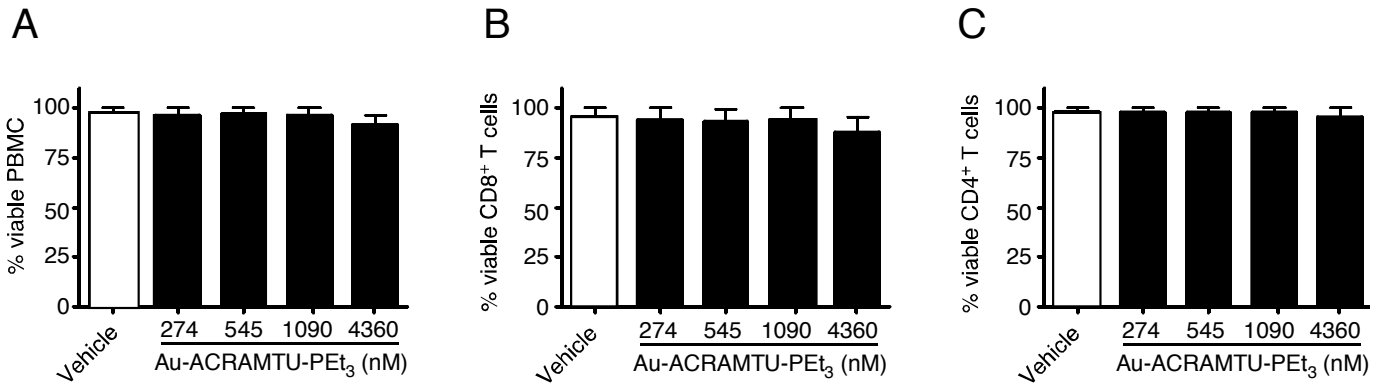

**Figure 4. Quantification of cell viability following incubation with Au-ACRAMTU-PET.** (A) PBMCs were incubated with with 0.1% DMF or the indicated concentration of Au-ACRAMTU-PET<sub>3</sub> for 60 minutes. Cells were then stimulated with PMA/ION in the presence of GolgiPlug and GolgiStop for 5 hours. Following surface staining cells were incubated with 7-AAD, washed and then intracellular staining for cytokines was performed. The percent of cells that were 7AAD<sup>-</sup> was determined for (A) PBMCs, (B) CD8<sup>+</sup> or (C) CD4<sup>+</sup> T cells. The mean and standard deviation are plotted. \*, significant difference between vehicle- and Au-ACRAMTU-PET<sub>3</sub>-treated cells, p<0.05, student's t test.
